# Supplementary material for: A review of simulation experiment techniques used to analyze wildfire effects on water quality and supply
Source: Royal Society of Chemistry journal article supplement (doi:10.1039/d2em00045h), 2022-01-01
Supplement: d2em00045h1.pdf [file d2em00045h1.pdf]

### Electronic Supplementary Information

A review of simulation experiment techniques used to analyze wildfire effects on water quality and supply

The studies included in this review have a complex set of study design factors and wide range of foci on different burn responses. However, for the purpose of cross-study analyses, we created simplified tables reporting five key hydrologic and water quality responses. These topically focused tables allow for useful cross-comparisons between simulation studies, in terms of the variability in measurements, the magnitude of responses for increasing burn intensity, and the level of statistical significance in results. Key responses synthesized include runoff, infiltration, sediment production, water repellency, and solutes/soil chemical properties—i.e., metals, nutrients, and organic matter in leachates and runoff, as well as in burned material. Results are divided into approximate burn intensities (unburned, mild, moderate, and severe), with peak temperature approximations selected by compiling temperature-based burn intensity scales in previous studies<sup>1-6</sup>. A summary column provides an approximate synthesis of each study's results, with estimated or reported error and variability displayed in the adjacent column. These summaries are reported with respect to unburned conditions unless otherwise stated, e.g. a *percent decrease* indicates the percent decrease of a response after burning from the control or unburned case in the study. Results were limited to those showing response exclusively to burning or fire exposure in various environments, while results from other joint treatments such as logging were excluded.

**Table 1** Runoff data reported from simulation studies. Time elapsed since the burn event (simulated or natural wildfire) and precipitation information are shown for each study. ± indicates the upper and lower bounds of the 95% confidence interval and parentheses indicate standard deviations. An *N/A* entry denotes an unreported study characteristic.

| Time elapsed post-burn | Precipitation intensity and duration                                                          | Runoff                                                                                 |                                                                        |                                                                                     |                                                                                                    | Summary                                                                                                                                                                                                     | Error and Variability                                     | Source                                |
|------------------------|-----------------------------------------------------------------------------------------------|----------------------------------------------------------------------------------------|------------------------------------------------------------------------|-------------------------------------------------------------------------------------|----------------------------------------------------------------------------------------------------|-------------------------------------------------------------------------------------------------------------------------------------------------------------------------------------------------------------|-----------------------------------------------------------|---------------------------------------|
|                        |                                                                                               | Unburned                                                                               | Mild Burn (~100-200 °C)                                                | Moderate Burn (~200-350 °C)                                                         | Severe Burn (~>350 °C)                                                                             |                                                                                                                                                                                                             |                                                           |                                       |
| 0 years                | 66-94 mm/hr (mean: 79 mm/hr) for 60 mins                                                      | Runoff ratio: 55%                                                                      |                                                                        | Runoff ratio: 58%                                                                   | Runoff ratio: 66%                                                                                  | Runoff ratios increased 5% for moderate burns and 20% for severe burns                                                                                                                                      | N/A                                                       | Benavides-Solorio and MacDonald, 2001 |
| 1 year                 |                                                                                               | Runoff ratio: 61%                                                                      |                                                                        | Runoff ratio: 48%                                                                   | Runoff ratio: 61%                                                                                  | Runoff ratios decreased 20% for moderate burns and 0% for severe burns                                                                                                                                      |                                                           |                                       |
| 6 years                |                                                                                               | Runoff ratio: 59%                                                                      |                                                                        | N/A                                                                                 | Runoff ratio: 36%                                                                                  | Runoff ratios decreased 39% for severe burns                                                                                                                                                                |                                                           |                                       |
| Same day               | 55 mm/hr for 45 mins                                                                          | Runoff ratio: 5 (8)%                                                                   | Runoff ratios: 6 (10)%                                                 | N/A                                                                                 | N/A                                                                                                | Runoff ratio increased 19% for mild burns                                                                                                                                                                   | Standard deviations ranged from 114% to 179% of the means | Emmerich and Cox, 1992                |
|                        | 110 mm/hr for 15 mins (subsequent)                                                            | Runoff ratio: 14 (16)%                                                                 | Runoff ratio: 17 (22)%                                                 |                                                                                     |                                                                                                    | Runoff ratio increased 23% for mild burns                                                                                                                                                                   |                                                           |                                       |
|                        | Total: average 151.5 mm/hr for 60 mins                                                        | Runoff ratio: 8 (11)%                                                                  | Runoff ratio: 10 (14)%                                                 |                                                                                     |                                                                                                    | Runoff ratio increased 21% for mild burns                                                                                                                                                                   |                                                           |                                       |
| N/A                    | Microplots: 50.5 mm/hr for 45-60 mins<br>Plots and catchments: variable natural precipitation | Runoff ratios: 5.5% and <1% for microplots, 0.09% and 0.05% for plots (two replicates) | Runoff ratios: 14.4% for microplots, 0.08% for plots (prescribed fire) | Runoff ratios: 23.2% for microplots (experimental fire)                             | Runoff ratios: 65.1% and 54.9% for microplots (two replicates), 11.6% for plots (natural wildfire) | Runoff ratios increased 343% and 14% for mild burns (microplots and plots, respectively), 614% for moderate burns (microplots), and 1746% and 16,471% for severe burns (microplots and plots, respectively) | N/A                                                       | Ferreira et al., 2005                 |
| 80 days                | 60 mm/hr for 60 mins                                                                          | Runoff ratios: 19% and 21% (two replicates)                                            | N/A                                                                    | N/A                                                                                 | Runoff ratios: 25% and 58% (two replicates)                                                        | Runoff ratios on average increased 104% for severe burns                                                                                                                                                    | Standard deviations ranged from 0% to 56% of the means    | Johansen, et al., 2001                |
|                        | 60 mm/hr for 30 mins (subsequent)                                                             | Runoff ratios: 20% and 18% (two replicates)                                            |                                                                        |                                                                                     | Runoff ratios: 35% and 58% (two replicates)                                                        | Runoff ratios on average increased 149% for severe burns                                                                                                                                                    |                                                           |                                       |
|                        | 60 mm/hr for 30 mins (subsequent)                                                             | Runoff ratios: 31% and 31% (two replicates)                                            |                                                                        |                                                                                     | Runoff ratios: 32% and 64% (two replicates)                                                        | Runoff ratios on average increased 55% for severe burns                                                                                                                                                     |                                                           |                                       |
| Same day               | 33 mm/hr for 4 hrs                                                                            | Runoff rates: 25-28 and 0.2-0.8 mm/hr peak (bare and litter-covered soils,             | N/A                                                                    | Runoff rates: 20-23 and 12-14 mm/hr peak (soils without and with ash, respectively) | N/A                                                                                                | Peak runoff rates decreased 2% and increased 2500% for moderate burns (samples without and with litter/ash, respectively)                                                                                   | N/A                                                       | Keesstra, et al., 2014                |

|           |                                                                                                                |                                                                                       |     |                                                        |                                                                     |                                                                                                                                            |                                                           |                        |
|-----------|----------------------------------------------------------------------------------------------------------------|---------------------------------------------------------------------------------------|-----|--------------------------------------------------------|---------------------------------------------------------------------|--------------------------------------------------------------------------------------------------------------------------------------------|-----------------------------------------------------------|------------------------|
|           |                                                                                                                | respectively)                                                                         |     |                                                        |                                                                     |                                                                                                                                            |                                                           |                        |
|           | 33 mm/hr for 2 hrs (subsequent)                                                                                | Runoff rates: 23 and 0.2-0.6 mm/hr peak (bare and litter-covered soils, respectively) |     | Runoff rates: 20-25 mm/hr steady state for all samples |                                                                     | Peak runoff rates decreased 19% and increased 5525% for moderate burns (samples without and with litter/ash, respectively)                 |                                                           |                        |
| 0 months  | 180 mm/hr for 5 mins                                                                                           | Runoff ratios: 9.1% total, and 8.7%, 14.7%, 1.4%, 18.2%, and 10.5%*                   | N/A | N/A                                                    | Runoff ratios: 34.0% total, and 8.7%, 17.9%, 1.7%, 15.2%, and 9.4%* | Runoff ratios increased 275% for the entire plot and on average increased 3% (range: -16% to 22%) for individual subplots for severe burns | N/A                                                       | Marcos et al., 2000    |
| 18 months |                                                                                                                | N/A                                                                                   |     |                                                        | Runoff ratios: 1.6%, 12.8%, 31.2%, 24.5%, and 1.1%*                 | Runoff ratios on average increased 396% (range: -89% to 2129%) for individual subplots for severe burns                                    |                                                           |                        |
| 0 years   | 100 mm/hr for 60 mins                                                                                          | Runoff ratio: 58 (3.5)%                                                               | N/A | N/A                                                    | Runoff ratio: 70 (1.1)%                                             | Runoff ratio increased 21% for severe burns                                                                                                | Standard deviations ranged from 2% to 11% of the means    | Robichaud et al., 2016 |
| 1 year    |                                                                                                                | Runoff ratio: 56 (3.9)%                                                               |     |                                                        | Runoff ratio: 61 (1.4)%                                             | Runoff ratio increased 9% for severe burns                                                                                                 |                                                           |                        |
| 2 years   |                                                                                                                | Runoff ratio: 53 (3.6)%                                                               |     |                                                        | Runoff ratio: 62 (1.3)%                                             | Runoff ratio increased 17% for severe burns                                                                                                |                                                           |                        |
| 5 years   |                                                                                                                | Runoff ratio: 53 (3.4)%                                                               |     |                                                        | Runoff ratio: 14 (1.5)%                                             | Runoff ratio decreased 74% for severe burns                                                                                                |                                                           |                        |
| 6 weeks   | Unburned: 58 mm/hr for 42 mins<br>Burned: 74 mm/hr for 60 mins                                                 | Runoff ratio: 0%<br>Peak runoff: 0 mm/hr                                              | N/A | N/A                                                    | Runoff ratio: 21%<br>Peak runoff: 33.5 mm/hr                        | Runoff ratio and peak runoff increased from no response, to 21% and 33.5 mm/hr, respectively, for severe burns                             | N/A                                                       | Rosso et al., 2007     |
|           | Unburned: 74 mm/hr for 61 mins<br>Burned: 68 mm/hr for 55 mins (several days later)                            | Runoff ratio: 0.4%<br>Peak runoff: 0.7 mm/hr                                          |     |                                                        | Runoff ratio: 24%<br>Peak runoff: 25.3 mm/hr                        | Runoff ratio and peak runoff increased 5900% and 3514%, respectively, for severe burns                                                     |                                                           |                        |
|           | Unburned: 74 mm/hr for 71 mins<br>Burned: 76 mm/hr for 60 mins (2 hrs later)                                   | Runoff ratio: 2%<br>Peak runoff: 2.2 mm/hr                                            |     |                                                        | Runoff ratio: 41%<br>Peak runoff: 41.3 mm/hr                        | Runoff ratio and peak runoff increased 1950% and 1777%, respectively, for severe burns                                                     |                                                           |                        |
| 0 years   | Unburned: 56.1, 57.3, 43.7, 44.6 mm/hr for 60 mins<br>Severe burn: 33.5, 33.9 mm/hr for 60 mins                | Runoff ratios: 0.0%, 0.3%, 0.0%, and 0.4% (four replicates)                           | N/A | N/A                                                    | Runoff ratios: 0.3% and 2.9% (two replicates)                       | Runoff ratio increased 715% for severe burns                                                                                               | Standard deviations ranged from 1.6% to 117% of the means | Simanton et al., 1986  |
|           | Unburned: 48.0, 46.8, 46.4, 49.2 mm/hr for 30 mins<br>Severe burn: 56.0, 51.4 mm/hr for 30 mins (24 hrs later) | Runoff ratios: 1.7%, 0.9%, 0.4%, and 3.3% (four replicates)                           |     |                                                        | Runoff ratios: 3.6% and 7.8% (two replicates)                       | Runoff ratio increased 266% for severe burns                                                                                               |                                                           |                        |
|           | Unburned: 69.6, 52.2, 91.4, 54.8 mm/hr for 30 mins<br>Severe burn: 66.4, 71.6 mm/hr for 30 mins                | Runoff ratios: 5.3%, 2.7%, 0.2%, and 4.7% (four replicates)                           |     |                                                        | Runoff ratios: 11.7% and 14.8% (two replicates)                     | Runoff ratio increased 314% for severe burns                                                                                               |                                                           |                        |

|           |                                                                                         |                       |                                               |     |                                                                                                     |                                                                                                                  |                                                         |                         |                                           |
|-----------|-----------------------------------------------------------------------------------------|-----------------------|-----------------------------------------------|-----|-----------------------------------------------------------------------------------------------------|------------------------------------------------------------------------------------------------------------------|---------------------------------------------------------|-------------------------|-------------------------------------------|
|           | (subsequent)                                                                            |                       |                                               |     |                                                                                                     |                                                                                                                  |                                                         |                         |                                           |
| 1/2 year  | 41.4, 45.8 mm/hr for 60 mins                                                            | N/A                   | N/A                                           | N/A | Runoff ratios: 0.2% and 1.3% (two replicates)                                                       | Runoff ratio increased 289% for severe burns                                                                     |                                                         |                         |                                           |
|           | 53.8, 55.0 mm/hr for 30 mins (24 hrs later)                                             |                       |                                               |     | Runoff ratios: 7.4% and 7.3% (two replicates)                                                       | Runoff ratio increased 374% for severe burns                                                                     |                                                         |                         |                                           |
|           | 59.2, 59.4 mm/hr for 30 mins (subsequent)                                               |                       |                                               |     | Runoff ratios: 21.3% and 17.8% (two replicates)                                                     | Runoff ratio increased 511% for severe burns                                                                     |                                                         |                         |                                           |
| 1 year    | 42.9, 44.2 mm/hr for 60 mins                                                            | N/A                   | Runoff ratios: 1.2% and 0.2% (two replicates) | N/A | N/A                                                                                                 | Runoff ratio increased 249% for mild burns                                                                       |                                                         |                         |                                           |
|           | 48.4, 51.4 mm/hr for 30 mins (24 hrs later)                                             |                       |                                               |     |                                                                                                     | Runoff ratios: 1.7% and 0.8% (two replicates)                                                                    |                                                         |                         | Runoff ratio decreased 22% for mild burns |
|           | 51.8, 51.4 mm/hr for 30 mins (subsequent)                                               |                       |                                               |     |                                                                                                     | Runoff ratios: 6.6% and 2.3% (two replicates)                                                                    |                                                         |                         | Runoff ratio increased 39% for mild burns |
| 6 months  | Unburned: 47 mm/hr for 44 mins<br>Burned: 35, 70 mm/hr for 35, 21 mins, respectively    | Peak runoff: 2 mm/hr  | N/A                                           | N/A | Peak runoff: 1 and 4 mm/hr (two replicates)                                                         | Peak runoff rates increased 25% for severe burns                                                                 | Standard deviations ranged from 13% to 85% of the means | Wilson, 1999            |                                           |
|           | Unburned: 75 mm/hr for 21 mins<br>Burned: 38, 68 mm/hr for 49, 21 mins, respectively    | Peak runoff: 8 mm/hr  |                                               |     |                                                                                                     | Peak runoff rates decreased 69% for severe burns                                                                 |                                                         |                         |                                           |
|           | Unburned: 162 mm/hr for 10 mins<br>Burned: 143, 110 mm/hr for 10, 14 mins, respectively | Peak runoff: 45 mm/hr |                                               |     |                                                                                                     | Peak runoff rates decreased 12% for severe burns                                                                 |                                                         |                         |                                           |
| 1 month   | 75 ± 0.4 mm/hr for 1 hr                                                                 | N/A                   | N/A                                           | N/A | Final runoff: 23 and 42 mm/hr<br>Runoff ratio: 15.8% and 44.2% (ash and no-ash plots, respectively) | Final runoff rates and runoff ratios increased 83% and 180%, respectively, when ash was removed for severe burns | N/A                                                     | Woods and Balfour, 2008 |                                           |
| 9 months  | 76 ± 0.4 mm/hr for 1 hr                                                                 |                       |                                               |     | Final runoff: 25 and 23 mm/hr<br>Runoff ratio: 27.5% and 21.4% (ash and no-ash plots, respectively) | Final runoff rates and runoff ratios decreased 8% and 22%, respectively, when ash was removed for severe burns   |                                                         |                         |                                           |
| 12 months | 75 ± 0.4 mm/hr for 1 hr                                                                 |                       |                                               |     | Final runoff: 46 and 45 mm/hr<br>Runoff ratio: 36.5% and 36.5% (ash and no-ash plots, respectively) | Final runoff rates and runoff ratios decreased 2% and 0%, respectively, when ash was removed for severe burns    |                                                         |                         |                                           |

\*for plots sown with herb species; herb and shrub species; herb and oak species; herb, shrub, and oak species; and unsown, respectively

3  
4  
5

**Table 2** Infiltration data reported from simulation studies. Time elapsed since the burn event (simulated or natural wildfire) and precipitation information are shown for each study. ± indicates the upper and lower bounds of the 95% confidence interval and parentheses indicate standard deviations. An N/A entry denotes an unreported study characteristic.

| Time elapsed post-burn | Precipitation intensity and duration | Infiltration                                                                                                                                                                                                                       |                                                                                                                                                                                                                              |                                                                                                              |                                                                                           | Summary                                                                                                                                                                        | Error and Variability                                  | Source                 |
|------------------------|--------------------------------------|------------------------------------------------------------------------------------------------------------------------------------------------------------------------------------------------------------------------------------|------------------------------------------------------------------------------------------------------------------------------------------------------------------------------------------------------------------------------|--------------------------------------------------------------------------------------------------------------|-------------------------------------------------------------------------------------------|--------------------------------------------------------------------------------------------------------------------------------------------------------------------------------|--------------------------------------------------------|------------------------|
|                        |                                      | Unburned                                                                                                                                                                                                                           | Mild Burn (~100-200 °C)                                                                                                                                                                                                      | Moderate Burn (~200-350 °C)                                                                                  | Severe Burn (~<350 °C)                                                                    |                                                                                                                                                                                |                                                        |                        |
| 3 months               | 20 for 15 mins                       | Saturated hydraulic conductivity: 505 ± 24, 812 ± 29, and 1114 ± 97 mm/hr (three replicates)                                                                                                                                       | N/A                                                                                                                                                                                                                          | Saturated hydraulic conductivity: 321 ± 104, 510 ± 96, and 263 ± 70 mm/hr (three replicates)                 | Saturated hydraulic conductivity: 62 ± 30, 69 ± 11, and 289 ± 35 mm/hr (three replicates) | Saturated hydraulic conductivity decreased on average 50% for moderate burn and 84% for severe burn areas                                                                      | 95% confidence intervals ranged 4%-48% of the means    | Blake et al., 2001     |
|                        | 40 mm/hr for 15 mins                 |                                                                                                                                                                                                                                    |                                                                                                                                                                                                                              |                                                                                                              |                                                                                           |                                                                                                                                                                                |                                                        |                        |
|                        | 60 mm/hr for 15 mins                 |                                                                                                                                                                                                                                    |                                                                                                                                                                                                                              |                                                                                                              |                                                                                           |                                                                                                                                                                                |                                                        |                        |
| 5 months               | 203 mm/hr for 50 mins                | Infiltration rates*: 202, 183, 146, and 105 mm/hr                                                                                                                                                                                  | Infiltration rates*: 129, 162, 110, and 76 mm/hr                                                                                                                                                                             | N/A                                                                                                          | N/A                                                                                       | Infiltration rates on average decreased 25% (range: 11%-36%) for mild burn areas                                                                                               | Standard deviations ranged 27% to 30% of the means     | Hester et al., 1997    |
| Same day               | 33 mm/hr for 4 hrs                   | Infiltration rates: 1.5 and 33 mm/hr (bare and litter-covered soils, respectively)                                                                                                                                                 | N/A                                                                                                                                                                                                                          | Infiltration rates: ~33 mm/hr peak, then decrease for all samples (ash was slightly higher than without ash) | N/A                                                                                       | Peak infiltration rates increased 2100% and decreased 0% for moderate burns (samples without and with litter/ash, respectively)                                                | N/A                                                    | Keesstra, et al., 2014 |
|                        | 33 mm/hr for 2 hrs (subsequent)      | Infiltration rates: 1.6 and 33 mm/hr (bare and litter-covered soils, respectively)                                                                                                                                                 |                                                                                                                                                                                                                              |                                                                                                              |                                                                                           |                                                                                                                                                                                |                                                        |                        |
| 10 months              | 203 mm/hr for 30 mins                | Infiltration rates: 124 and 128 mm/hr (two replicates)                                                                                                                                                                             | Infiltration rate: 128 mm/hr                                                                                                                                                                                                 | N/A                                                                                                          | N/A                                                                                       | Infiltration rates increased 1.6% for mild burns                                                                                                                               | Standard deviation was 2% of the mean                  | Knight et al., 1983    |
| 0 years                | 100 mm/hr for 60 mins                | Infiltration rate: 44 (3.5) mm/hr                                                                                                                                                                                                  | N/A                                                                                                                                                                                                                          | N/A                                                                                                          | Infiltration rate: 31 (1.0) mm/hr                                                         | Infiltration rate decreased 30% for severe burns                                                                                                                               | Standard deviations ranged from 2% to 9% of the means  | Robichaud et al., 2016 |
| 1 year                 |                                      | Infiltration rate: 45 (4.0) mm/hr                                                                                                                                                                                                  |                                                                                                                                                                                                                              |                                                                                                              | Infiltration rate: 38 (1.4) mm/hr                                                         | Infiltration rate decreased 16% for severe burns                                                                                                                               |                                                        |                        |
| 2 years                |                                      | Infiltration rate: 48 (3.6) mm/hr                                                                                                                                                                                                  |                                                                                                                                                                                                                              |                                                                                                              | Infiltration rate: 37 (1.3) mm/hr                                                         | Infiltration rate decreased 23% for severe burns                                                                                                                               |                                                        |                        |
| 5 years                |                                      | Infiltration rate: 47 (3.4) mm/hr                                                                                                                                                                                                  |                                                                                                                                                                                                                              |                                                                                                              | Infiltration rate: 84 (1.5) mm/hr                                                         | Infiltration rate increased 79% for severe burns                                                                                                                               |                                                        |                        |
| 1-2 months             | 83.8 mm/hr for 60 mins               | Infiltration rates**: 83.2 and 82.8, 78.2 and 80.2, 80.7 and 81.5, and 57.6 and 41.2 mm/hr for dry conditions; 82.6 and 82.2, 72.5 and 74.2, 77.6 and 78.2, and 37.5 and 19.5 mm/hr for field capacity conditions (two replicates) | Infiltration rates**: 83.2 and 82.8, 78.2 and 80.2, 80.7 and 81.5, and 57.6 and 41.2 mm/hr for dry conditions; 82.6 and 82.2, 72.5 and 74.2, 77.6 and 78.2, and 37.5 and 19.5 for field capacity conditions (two replicates) | N/A                                                                                                          | N/A                                                                                       | Infiltration rates on average decreased 2.3% (range: 0.6% to 3.8%) and 10.6% (range: -1.4% to 14.9%) (dry and field capacity moisture conditions, respectively) for mild burns | Standard deviations ranged from 0% to 30% of the means | Roundy et al., 1978    |
| 1 year                 |                                      | N/A                                                                                                                                                                                                                                | Infiltration rates**: 82.0 and 81.3, 72.3 and 75.5, 77.1 and 78.4, and 45.3 and 59.7 mm/hr for dry conditions; 78 and 75.8, 57.2 and 58.3, 67.6 and 67.1, and 22.5 and 38.5                                                  |                                                                                                              |                                                                                           |                                                                                                                                                                                |                                                        |                        |

|           |                                                                                         |                                                                   | mm/hr for field capacity conditions (two replicates) |                                                                   |                                                                          |                                                                                                             |                                                         |                         |
|-----------|-----------------------------------------------------------------------------------------|-------------------------------------------------------------------|------------------------------------------------------|-------------------------------------------------------------------|--------------------------------------------------------------------------|-------------------------------------------------------------------------------------------------------------|---------------------------------------------------------|-------------------------|
| Same day  | 23 mm/hr for 80 mins                                                                    | Field saturated hydraulic conductivity: $3.7 \times 10^{-4}$ mm/s | N/A                                                  | Field saturated hydraulic conductivity: $2.0 \times 10^{-4}$ mm/s | Field saturated hydraulic conductivity: $14 \times 10^{-4}$ mm/s         | Field saturated hydraulic conductivity decreased 46% for moderate burns and increased 278% for severe burns | N/A                                                     | Wieting et al., 2017    |
| 6 months  | Unburned: 47 mm/hr for 44 mins<br>Burned: 35, 70 mm/hr for 35, 21 mins, respectively    | Infiltration rate: 45 mm/hr                                       | N/A                                                  | N/A                                                               | Infiltration rates: 37 and 66 mm/hr (two replicates)                     | Infiltration rate increased 14% for severe burns                                                            | Standard deviations ranged from 30% to 40% of the means | Wilson, 1999            |
|           | Unburned: 75 mm/hr for 21 mins<br>Burned: 38, 68 mm/hr for 49, 21 mins, respectively    | Infiltration rate: 67 mm/hr                                       |                                                      |                                                                   | Infiltration rates: 37 and 64 mm/hr (two replicates)                     | Infiltration rate decreased 25% for severe burns                                                            |                                                         |                         |
|           | Unburned: 162 mm/hr for 10 mins<br>Burned: 143, 110 mm/hr for 10, 14 mins, respectively | Infiltration rate: 117 mm/hr                                      |                                                      |                                                                   | Infiltration rates: 114 and 74 mm/hr (two replicates)                    | Infiltration rate decreased 20% for severe burns                                                            |                                                         |                         |
| 1 month   | $75 \pm 0.4$ mm/hr for 1 hr                                                             | N/A                                                               | N/A                                                  | N/A                                                               | Infiltration rates: 62 and 42 mm/hr (ash and no-ash plots, respectively) | Infiltration rates decreased 32% when ash was removed for severe burns                                      | N/A                                                     | Woods and Balfour, 2008 |
| 9 months  | $76 \pm 0.4$ mm/hr for 1 hr                                                             |                                                                   |                                                      |                                                                   | Infiltration rates: 56 and 58 mm/hr (ash and no-ash plots, respectively) | Infiltration rates increased 4% when ash was removed for severe burns                                       |                                                         |                         |
| 12 months | $75 \pm 0.4$ mm/hr for 1 hr                                                             |                                                                   |                                                      |                                                                   | Infiltration rates: 48 and 48 mm/hr (ash and no-ash plots, respectively) | Infiltration rates did not change when ash was removed for severe burns                                     |                                                         |                         |

8 \*oak, juniper, bunchgrass, and shortgrass sites, respectively

9 \*\*for tree coppice, shrub coppice, all coppice, and interspace, respectively

**Table 3** Sedimentation and erosion data reported from simulation studies. Time elapsed since the burn event (simulated or natural wildfire) and precipitation information are shown for each study. ± indicates the upper and lower bounds of the 95% confidence interval and parentheses indicate standard deviations. An N/A entry denotes an unreported study characteristic.

| Time elapsed post-burn | Precipitation intensity and duration     | Sedimentation and Erosion                                                       |                                                           |                                                         |                                                                                  | Summary                                                                                                                                                      | Error and Variability                                     | Source                                |                                                                                                                                                      |
|------------------------|------------------------------------------|---------------------------------------------------------------------------------|-----------------------------------------------------------|---------------------------------------------------------|----------------------------------------------------------------------------------|--------------------------------------------------------------------------------------------------------------------------------------------------------------|-----------------------------------------------------------|---------------------------------------|------------------------------------------------------------------------------------------------------------------------------------------------------|
|                        |                                          | Unburned                                                                        | Mild Burn (~100-200 °C)                                   | Moderate Burn (~200-350 °C)                             | Severe Burn (~<350 °C)                                                           |                                                                                                                                                              |                                                           |                                       |                                                                                                                                                      |
| 0 years                | 66-94 mm/hr (mean: 79 mm/hr) for 60 mins | Total sediment: 43 g<br>Sediment concentration: 1.9 g/L                         |                                                           | Total sediment: 89 g<br>Sediment concentration: 4.0 g/L | Total sediment: 428 g<br>Sediment concentration: 23.5 g/L                        | Total and suspended sediment increased 107% and decreased 79%, respectively, for moderate burns and increased 895% and 1137%, respectively, for severe burns | N/A                                                       | Benavides-Solorio and MacDonald, 2001 |                                                                                                                                                      |
| 1 year                 |                                          | Total sediment: 13 g<br>Sediment concentration: 0.6 g/L                         |                                                           | Total sediment: 76 g<br>Sediment concentration: 3.5 g/L | Total sediment: 342 g<br>Sediment concentration: 17.1 g/L                        |                                                                                                                                                              |                                                           |                                       | Total and suspended sediment increased 485% and 483%, respectively, for moderate burns and increased 2392% and 2750%, respectively, for severe burns |
| 6 years                |                                          | Total sediment: 13 g<br>Sediment concentration: 0.5 g/L                         |                                                           | N/A                                                     | Total sediment: 27 g<br>Sediment concentration: 1.7 g/L                          |                                                                                                                                                              |                                                           |                                       | Total and suspended sediment increased 108% and 240%, respectively, for severe burns                                                                 |
| 3 months               | 20 for 15 mins                           | Sediment concentration: ~2.5 g/L                                                | N/A                                                       | Sediment concentration: ~3 g/L                          | Sediment concentration: ~5 g/L                                                   | Suspended sediment concentration increased 20% for moderate burns and 100% for severe burns                                                                  | N/A                                                       | Blake et al., 2001                    |                                                                                                                                                      |
|                        | 40 mm/hr for 15 mins                     | Sediment concentration: ~1 g/L                                                  |                                                           | Sediment concentration: ~1.5 g/L                        | Sediment concentrations: ~2.5 g/L                                                | Suspended sediment concentration increased 50% for moderate burns and 150% for severe burns                                                                  |                                                           |                                       |                                                                                                                                                      |
|                        | 60 mm/hr for 15 mins                     | Sediment concentration: < 0.1 g/L                                               |                                                           | Sediment concentration: ~1 g/L                          | Sediment concentrations: ~2 g/L                                                  | Suspended sediment concentration increased 900% for moderate burns and 1900% for severe burns                                                                |                                                           |                                       |                                                                                                                                                      |
| Same day               | 55 mm/hr for 45 mins                     | Sediment yield: 2.5 (4.7) g/m <sup>2</sup>                                      | Sediment yield: 3.4 (6.7) g/m <sup>2</sup>                | N/A                                                     | N/A                                                                              | Sediment yield increased 36% for mild burns                                                                                                                  | Standard deviations ranged from 112% to 197% of the means | Emmerich and Cox, 1992                |                                                                                                                                                      |
|                        | 110 mm/hr for 15 mins (subsequent)       | Sediment yield: 5.0 (5.6) g/m <sup>2</sup>                                      | Sediment yield: 7.2 (8.7) g/m <sup>2</sup>                |                                                         |                                                                                  | Sediment yield increased 44% for mild burns                                                                                                                  |                                                           |                                       |                                                                                                                                                      |
|                        | Total: average 151.5 mm/hr for 60 mins   | Sediment yield: 7.6 (9.8) g/m <sup>2</sup>                                      | Sediment yield: 10.6 (14.5) g/m <sup>2</sup>              |                                                         |                                                                                  | Sediment yield increased 39% for mild burns                                                                                                                  |                                                           |                                       |                                                                                                                                                      |
| 5 months               | 203 mm/hr for 50 mins                    | Sediment yield: 0.2, 3.4, 30, and 130 g/m <sup>2</sup> *                        | Sediment yield: 450, 193, 446, and 577 g/m <sup>2</sup> * | N/A                                                     | N/A                                                                              | Sediment yield on average increased 58,049% (range: 344%-224,900%) for mild burn areas                                                                       | Standard deviations ranged from 39% to 149% of the means  | Hester et al., 1997                   |                                                                                                                                                      |
| 80 days                | 60 mm/hr for 60 mins                     | Sediment yield per mm precip: 0.3 and 0.4 g/m <sup>2</sup> -mm (two replicates) | N/A                                                       | N/A                                                     | Sediment yield per mm precip: 2.8 and 11 g/m <sup>2</sup> -mm (two replicates)   | Sediment yield per mm precip increased 1742% for severe burns                                                                                                | Standard deviations ranged from 0% to 84% of the means    | Johansen, et al., 2001                |                                                                                                                                                      |
|                        | 60 mm/hr for 30 mins (subsequent)        | Sediment yield per mm precip: 0.2 and 0.3 g/m <sup>2</sup> -mm (two replicates) |                                                           |                                                         | Sediment yield per mm precip: 4.8 and 11.3 g/m <sup>2</sup> -mm (two replicates) | Sediment yield per mm precip increased 2983% for severe burns                                                                                                |                                                           |                                       |                                                                                                                                                      |
|                        | 60 mm/hr for 30 mins (subsequent)        | Sediment yield per mm precip: 0.3 and 0.4 g/m <sup>2</sup> -mm (two replicates) |                                                           |                                                         | Sediment yield per mm precip: 4.1 and 11.3 g/m <sup>2</sup> -mm (two replicates) | Sediment yield per mm precip increased 1996% for severe burns                                                                                                |                                                           |                                       |                                                                                                                                                      |

|           |                                                                                     |                                                                                                       |                                      |                                                                                                        |                                                                                                               |                                                                                                                                                                            |                                                        |                        |
|-----------|-------------------------------------------------------------------------------------|-------------------------------------------------------------------------------------------------------|--------------------------------------|--------------------------------------------------------------------------------------------------------|---------------------------------------------------------------------------------------------------------------|----------------------------------------------------------------------------------------------------------------------------------------------------------------------------|--------------------------------------------------------|------------------------|
| Same day  | 33 mm/hr for 4 hrs                                                                  | Sedimentation rates: 168 and 0 g/m <sup>2</sup> -hr (bare and litter-covered soils, respectively)     | N/A                                  | Sedimentation rates: ~60-90 and ~30 g/m <sup>2</sup> -hr (soils without and with ash, respectively)    | N/A                                                                                                           | Peak sedimentation rates decreased 55% for samples without litter/ash and samples with litter/ash increased from no response to 40% of the bare samples for moderates      | N/A                                                    | Keesstra, et al., 2014 |
|           | 33 mm/hr for 2 hrs (subsequent)                                                     | Sedimentation rates: 222-252 and 0 g/m <sup>2</sup> -hr (bare and litter-covered soils, respectively) |                                      | Sedimentation rates: ~105-120 and ~105 g/m <sup>2</sup> -hr (soils without and with ash, respectively) |                                                                                                               | Peak sedimentation rates decreased 53% for samples without litter/ash and samples with litter/ash increased from no response to 93% of the bare samples for moderate burns |                                                        |                        |
| 10 months | 203 mm/hr for 30 mins                                                               | Sediment yield: 73 and 196 g/m <sup>2</sup> (two replicates)                                          | Sediment yield: 130 g/m <sup>2</sup> | N/A                                                                                                    | N/A                                                                                                           | Sediment yield decreased 3% for mild burns                                                                                                                                 | Standard deviation was 65% of the mean                 | Knight et al., 1983    |
| 0 months  | 180 mm/hr for 5 mins                                                                | Sediment yield: 1.18 g/m <sup>2</sup> total, and 1.66, 20.11, 5.16, 8.80, and 4.94 g/m <sup>2</sup>   | N/A                                  | N/A                                                                                                    | Sediment yield: 10.32 g/m <sup>2</sup> total, and 17.06, 10.38, 5.11, (lost data), and 11.23 g/m <sup>2</sup> | Sediment yields increased 775% for the entire plot and on average increased 241% (range: -48% to 928%) for individual subplots for severe burns                            | N/A                                                    | Marcos et al., 2000    |
| 18 months |                                                                                     | N/A                                                                                                   |                                      |                                                                                                        | Sediment yield: 0.32, 17.99, 12.07, 14.23, and 4.49 g/m <sup>2</sup>                                          | Sediment yields on average increased 19% (range: -81% to 134%) for individual subplots for severe burns                                                                    |                                                        |                        |
| 0 years   | 100 mm/hr for 60 mins                                                               | Sediment yield: 50 (7.1) g/m <sup>2</sup>                                                             | N/A                                  | N/A                                                                                                    | Sediment yield: 1757 (114) g/m <sup>2</sup>                                                                   | Sediment yield increased 3414% for severe burns                                                                                                                            | Standard deviations ranged from 5% to 41% of the means | Robichaud et al., 2016 |
| 1 year    |                                                                                     | Sediment yield: 15 (3.0) g/m <sup>2</sup>                                                             |                                      |                                                                                                        | Sediment yield: 1099 (60) g/m <sup>2</sup>                                                                    | Sediment yield increased 7227% for severe burns                                                                                                                            |                                                        |                        |
| 2 years   |                                                                                     | Sediment yield: 7 (1.4) g/m <sup>2</sup>                                                              |                                      |                                                                                                        | Sediment yield: 391 (47) g/m <sup>2</sup>                                                                     | Sediment yield increased 5486% for severe burns                                                                                                                            |                                                        |                        |
| 5 years   |                                                                                     | Sediment yield: 54 (22) g/m <sup>2</sup>                                                              |                                      |                                                                                                        | Sediment yield: 15 (3.6) g/m <sup>2</sup>                                                                     | Sediment yield decreased 72% for severe burns                                                                                                                              |                                                        |                        |
| 6 weeks   | Unburned: 58 mm/hr for 42 mins<br>Burned: 74 mm/hr for 60 mins                      | Sedimentation rate: 0 g/m <sup>2</sup> -hr                                                            | N/A                                  | N/A                                                                                                    | Sedimentation rate: 16.8 g/m <sup>2</sup> -hr                                                                 | Sedimentation rate increased from no response to 16.8 g/m <sup>2</sup> -hr for severe burns                                                                                | N/A                                                    | Rosso et al., 2007     |
|           | Unburned: 74 mm/hr for 61 mins<br>Burned: 68 mm/hr for 55 mins (several days later) | Sedimentation rate: 0.1 g/m <sup>2</sup> -hr                                                          |                                      |                                                                                                        | Sedimentation rate: 17.8 g/m <sup>2</sup> -hr                                                                 | Sedimentation rate increased 17700% for severe burns                                                                                                                       |                                                        |                        |
|           | Unburned: 74 mm/hr for 71 mins<br>Burned: 76 mm/hr for 60 mins (2 hrs later)        | Sedimentation rate: 0.2 g/m <sup>2</sup> -hr                                                          |                                      |                                                                                                        | Sedimentation rate: 32.9 g/m <sup>2</sup> -hr                                                                 | Sedimentation rate increased 16350% for severe burns                                                                                                                       |                                                        |                        |

|            |                                                                                                                |                                                                                                                                                                                                                |                                                                                                                                                                                                                        |     |                                                                 |                                                                                                                                                                                  |                                             |                        |
|------------|----------------------------------------------------------------------------------------------------------------|----------------------------------------------------------------------------------------------------------------------------------------------------------------------------------------------------------------|------------------------------------------------------------------------------------------------------------------------------------------------------------------------------------------------------------------------|-----|-----------------------------------------------------------------|----------------------------------------------------------------------------------------------------------------------------------------------------------------------------------|---------------------------------------------|------------------------|
| 1-2 months | 83.8 mm/hr for 60 mins                                                                                         | Sediment yields**: 49 and 105, 397 and 537, 140 and 240, and 932 and 1445 kg/ha for dry conditions; 50 and 98, 572 and 813, 157 and 282, and 850 and 1820 kg/ha for field capacity conditions (two replicates) | Sediment yields**: 181 and 389, 630 and 794, 338 and 550, and 666 and 1047 kg/ha for dry conditions; 194 and 603, 1046 and 1096, 456 and 813, and 870 and 2188 kg/ha for field capacity conditions (two replicates)    | N/A | N/A                                                             | Sediment yields on average increased 107% (range: -28% to 270%) and 174% (range: 15% to 439%) (dry and field capacity antecedent moisture contents, respectively) for mild burns | N/A                                         | Roundy et al., 1978    |
| 1 year     |                                                                                                                | N/A                                                                                                                                                                                                            | Sediment yields**: 55 and 457, 1229 and 1148, 262 and 724, and 1697 and 997 kg/ha for dry conditions; 190 and 741, 1861 and 1585, 602 and 1072, and 2753 and 1145 kg/ha for field capacity conditions (two replicates) |     |                                                                 | Sediment yields on average increased 140% (range: 13% to 232%) and 251% (range: 46% to 529%) (dry and field capacity antecedent moisture contents, respectively) for mild burns  |                                             |                        |
| 0 years    | Unburned: 56.1, 57.3, 43.7, 44.6 mm/hr for 60 mins<br>Severe burn: 33.5, 33.9 mm/hr for 60 mins                | Sediment yield: 0.0, 1.2, 0.0, and 0.5 g/m <sup>2</sup> (four replicates)                                                                                                                                      | N/A                                                                                                                                                                                                                    | N/A | Sediment yield: 0.0 and 7.3 g/m <sup>2</sup> (two replicates)   | Sediment yield increased 798% for severe burns                                                                                                                                   | Standard deviations ranged from 15% to 141% | Simant on et al., 1986 |
|            | Unburned: 48.0, 46.8, 46.4, 49.2 mm/hr for 30 mins<br>Severe burn: 56.0, 51.4 mm/hr for 30 mins (24 hrs later) | Sediment yield: 1.1, 1.7, 0.1, and 2.0 g/m <sup>2</sup> (four replicates)                                                                                                                                      |                                                                                                                                                                                                                        |     | Sediment yield: 11 and 17.1 g/m <sup>2</sup> (two replicates)   | Sediment yield increased 1044% for severe burns                                                                                                                                  |                                             |                        |
|            | Unburned: 69.6, 52.2, 91.4, 54.8 mm/hr for 30 mins<br>Severe burn: 66.4, 71.6 mm/hr for 30 mins (subsequent)   | Sediment yield: 7.9, 9.8, 0.5, and 4.8 g/m <sup>2</sup> (four replicates)                                                                                                                                      |                                                                                                                                                                                                                        |     | Sediment yield: 40.8 and 50.3 g/m <sup>2</sup> (two replicates) | Sediment yield increased 692% for severe burns                                                                                                                                   |                                             |                        |
| 1/2 year   | 41.4, 45.8 mm/hr for 60 mins                                                                                   | N/A                                                                                                                                                                                                            | N/A                                                                                                                                                                                                                    | N/A | Sediment yield: 0.06 and 1.9 g/m <sup>2</sup> (two replicates)  | Sediment yield increased 144% for severe burns                                                                                                                                   |                                             |                        |
|            | 53.8, 55.0 mm/hr for 30 mins (24 hrs later)                                                                    |                                                                                                                                                                                                                |                                                                                                                                                                                                                        |     | Sediment yield: 18.8 and 13.6 g/m <sup>2</sup> (two replicates) | Sediment yield increased 1216% for severe burns                                                                                                                                  |                                             |                        |
|            | 59.2, 59.4 mm/hr for 30 mins (subsequent)                                                                      |                                                                                                                                                                                                                |                                                                                                                                                                                                                        |     | Sediment yield: 65.1 and 28.1 g/m <sup>2</sup> (two replicates) | Sediment yield increased 711% for severe burns                                                                                                                                   |                                             |                        |
| 1 year     | 42.9, 44.2 mm/hr for 60 mins                                                                                   | N/A                                                                                                                                                                                                            | Sediment yield: 0.5 and 0.05 g/m <sup>2</sup> (two replicates)                                                                                                                                                         | N/A | N/A                                                             | Sediment yield increased 534% for mild burns                                                                                                                                     |                                             |                        |
|            | 48.4, 51.4 mm/hr for 30 mins (24 hrs later)                                                                    |                                                                                                                                                                                                                | Sediment yield: 3.2 and 1.3 g/m <sup>2</sup> (two replicates)                                                                                                                                                          |     |                                                                 | Sediment yield increased 84% for mild burns                                                                                                                                      |                                             |                        |
|            | 51.8, 51.4 mm/hr                                                                                               |                                                                                                                                                                                                                | Sediment yield: 18.9 and                                                                                                                                                                                               |     |                                                                 | Sediment yield increased 136% for                                                                                                                                                |                                             |                        |



|           | for 30 mins (subsequent)                                                                |                                       | 8.3 g/m <sup>2</sup> (two replicates) |     |                                                                                                                                       | mild burns                                                                                                            |                                                                                                                                |                         |
|-----------|-----------------------------------------------------------------------------------------|---------------------------------------|---------------------------------------|-----|---------------------------------------------------------------------------------------------------------------------------------------|-----------------------------------------------------------------------------------------------------------------------|--------------------------------------------------------------------------------------------------------------------------------|-------------------------|
| 6 months  | Unburned: 47 mm/hr for 44 mins<br>Burned: 35, 70 mm/hr for 35, 21 mins, respectively    | Sediment yield: 0.09 g/m <sup>2</sup> | N/A                                   | N/A | Sediment yield: 0.03 and 1.5 g/m <sup>2</sup> (two replicates)                                                                        | Sediment yield increased 730% for severe burns                                                                        | Standard deviations ranged from 15% to 136% of the means                                                                       | Wilson, 1999            |
|           | Unburned: 75 mm/hr for 21 mins<br>Burned: 38, 68 mm/hr for 49, 21 mins, respectively    | Sediment yield: 1.3 g/m <sup>2</sup>  |                                       |     | Sediment yield: 0.03 and 1.2 g/m <sup>2</sup> (two replicates)                                                                        | Sediment yield decreased 53% for severe burns                                                                         |                                                                                                                                |                         |
|           | Unburned: 162 mm/hr for 10 mins<br>Burned: 143, 110 mm/hr for 10, 14 mins, respectively | Sediment yield: 20 g/m <sup>2</sup>   |                                       |     | Sediment yield: 81 and 100 g/m <sup>2</sup> (two replicates)                                                                          | Sediment yield increased 353% for severe burns                                                                        |                                                                                                                                |                         |
| 1 month   | 75 ± 0.4 mm/hr for 1 hr                                                                 | N/A                                   | N/A                                   | N/A | Sediment yield: 137 ± 98 and 520 ± 225 g<br>Sediment concentration: 22 ± 9 g/L and 35 ± 23 g/L (ash and no-ash plots, respectively)   | Sediment yield and sediment concentration increased 280% and 59%, respectively, when ash was removed for severe burns | Standard deviations ranged from 41%-140% and 43%-100% of the means for sediment yield and sediment concentration, respectively | Woods and Balfour, 2008 |
| 9 months  | 76 ± 0.4 mm/hr for 1 hr                                                                 |                                       |                                       |     | Sediment yield: 207 ± 247 and 58 ± 40 g<br>Sediment concentration: 17 ± 12 g/L and 8.0 ± 6.0 g/L (ash and no-ash plots, respectively) | Sediment yield and sediment concentration decreased 72% and 53%, respectively, when ash was removed for severe burns  |                                                                                                                                |                         |
| 12 months | 75 ± 0.4 mm/hr for 1 hr                                                                 |                                       |                                       |     | Sediment yield: 33 ± 33 and 16 ± 16 g<br>Sediment concentration: 3.0 ± 4.2 g/L and 1.4 ± 1.2 g/L (ash and no-ash plots, respectively) | Sediment yield and sediment concentration decreased 52% and 53%, respectively, when ash was removed for severe burns  |                                                                                                                                |                         |

2 \*oak, juniper, bunchgrass, and shortgrass sites, respectively

3 \*\*for tree coppice, shrub coppice, all coppice, and interspace, respectively

**Table 4** Water repellency data reported from simulation studies.  $\pm$  indicates the upper and lower bounds of the 95% confidence interval and parentheses indicate standard deviations. An *N/A* entry denotes an unreported study characteristic, *O horizon* is *organic soil horizon*, *Ah horizon* is *soil mineral horizon*, and *WDPT* is *water drop penetration time*.

| Water repellency                                                                                                            |                                                                                                                                               |                                                                                                                                                                                                                                                                                |                                                                                                                           | Summary                                                                                                                                                                                                   | Error and Variability                                  | Source                                |
|-----------------------------------------------------------------------------------------------------------------------------|-----------------------------------------------------------------------------------------------------------------------------------------------|--------------------------------------------------------------------------------------------------------------------------------------------------------------------------------------------------------------------------------------------------------------------------------|---------------------------------------------------------------------------------------------------------------------------|-----------------------------------------------------------------------------------------------------------------------------------------------------------------------------------------------------------|--------------------------------------------------------|---------------------------------------|
| Unburned                                                                                                                    | Mild Burn (~100-200 °C)                                                                                                                       | Moderate Burn (~200-350 °C)                                                                                                                                                                                                                                                    | Severe Burn (~<350 °C)                                                                                                    |                                                                                                                                                                                                           |                                                        |                                       |
| Ethanol %: O horizon: 36.0 $\pm$ 0; Ah horizon: 24.0 $\pm$ 0, 22.0 $\pm$ 3.5, and 20.0 $\pm$ 3.5*                           | N/A                                                                                                                                           | Ethanol %: O horizon: 0 $\pm$ 0 and 1.7 $\pm$ 2.9 (ashes and O charred, respectively); Ah horizon: 6.2 $\pm$ 2.0, 18.3 $\pm$ 5.5, and 18.3 $\pm$ 5.5*                                                                                                                          | N/A                                                                                                                       | Ethanol % decreased 98% for the O horizon and 74%, 17%, and 9% for 3 depths in the Ah horizon*, respectively, for moderate burns                                                                          | N/A                                                    | Badía-Villas et al., 2014             |
| Max WDPT tests: ~110, 120, and 90 s (three replicates)                                                                      |                                                                                                                                               | Max WDPT tests: ~100 and 100 s (three replicates)                                                                                                                                                                                                                              | Max WDPT tests: ~100, 120, and 0 s (three replicates)                                                                     | Max WDPT tests decreased ~6% for moderate burns and ~31% for severe burns                                                                                                                                 | Standard deviations ranged from 0% to 88% of the means | Benavides-Solorio and MacDonald, 2001 |
| N/A                                                                                                                         | 149 °C (300 °F) for 5, 10, 15, and 20 mins: no increase in non-wettability                                                                    | 204 °C (400 °F) for 5 and 10 mins: no increase in non-wettability, increase after 10 and 20 minutes; 260 °C (500 °F): impenetrability reached after 10 mins; > 316 °C (600 °F): impenetrability reached after 5 minutes                                                        | 427 °C (800 °F) and 482 °C (900 °F): non-wettability started decreasing after 10 mins                                     | Non-wettability: no increase for low burns, increase after 10-20 mins for mild-moderate burns; impenetrability reached in 5-10 mins for moderate burns; started decreasing after 10 mins for severe burns | N/A                                                    | Debano and Krammes, 1966              |
| Ethanol %: ~0-6                                                                                                             | Ethanol %: 4.3 (prescribed fire)                                                                                                              | Ethanol %: 9.46 (experimental fire)                                                                                                                                                                                                                                            | N/A                                                                                                                       | Ethanol % increased 43% for mild burns and 215% for moderate burns                                                                                                                                        | N/A                                                    | Ferreira et al., 2005                 |
| N/A                                                                                                                         | N/A                                                                                                                                           | WR test** before precip: 1.07 and 1.48 (4- and 15-mm aggregate, respectively), ash removed; 1.49 (15-mm aggregate) with ash<br>After precip: 1.28 and 1.23 (4- and 15-mm aggregate, respectively), ash removed; 1.13 and 1.02 (4- and 15-mm aggregate, respectively), with ash | N/A                                                                                                                       | WDPT tests decreased by 1% for samples with removed ash before the precip and on average increased 17% (range: 13%-21%) for samples with removed ash after the precip                                     | N/A                                                    | Keesstra, et al., 2014                |
| WDPT test ranges***: 5 to 60, 5 to 60, > 60, and 5 to 60 s (dry conditions); 5 to 60, > 60, < 5, and < 5 s (wet conditions) | WDPT test ranges***: (missing data), > 60, 5 to 60, and 5 to 60 s (dry conditions); 5 to 60, 5 to 60, 5 to 60, and 5 to 60 s (wet conditions) | WDPT test ranges***: < 5, 5 to 60, 5 to 60, and 5 to 60 s (dry conditions); < 5, (missing data), (missing data), and 5 to 60 s (wet conditions)                                                                                                                                | WDPT test ranges***: < 5, < 5, < 5, and 5 to 60 s (dry conditions); 5 to 60, < 5, 5 to 60, and 5 to 60 s (wet conditions) | WDPT tests increased ~70% and ~600% for mild burn, decreased ~40% and increased ~1000% for moderate burns, and decreased ~70% and increased ~600% for severe burns (dry and wet conditions, respectively) | N/A                                                    | Robichaud and Hungerford, 2000        |
| 0 yrs post-burn: Water repellency occurrence: 93 (3.9) %                                                                    | N/A                                                                                                                                           | N/A                                                                                                                                                                                                                                                                            | 0 yrs post-burn: Water repellency occurrence: 88 (2.3) %                                                                  | 0 yrs post-burn: Water repellency occurrence decreased 5% for severe burns                                                                                                                                | Standard deviations ranged from 3% to 22% of the means | Robichaud et al., 2016                |
| 1 yr post-burn: Water repellency occurrence: 39 (8.6) %                                                                     |                                                                                                                                               |                                                                                                                                                                                                                                                                                | 1 yr post-burn: Water repellency occurrence: 79 (3.5) %                                                                   | 1 yr post-burn: Water repellency occurrence increased 103% for severe burns                                                                                                                               |                                                        |                                       |
| 2 yrs post-burn: Water repellency occurrence: 51 (8.8) %                                                                    |                                                                                                                                               |                                                                                                                                                                                                                                                                                | 2 yrs post-burn: Water repellency occurrence: 48 (4.4) %                                                                  | 2 yrs post-burn: Water repellency occurrence decreased 6% for severe burns                                                                                                                                |                                                        |                                       |
| 5 yrs post-burn: Water repellency occurrence: 94 (4.1) %                                                                    |                                                                                                                                               |                                                                                                                                                                                                                                                                                | 5 yrs post-burn: Water repellency occurrence: 45 (5.2) %                                                                  | 5 yrs post-burn: Water repellency occurrence decreased 52% for severe burns                                                                                                                               |                                                        |                                       |
| WDPT test**** ranges: < 5 to 225, < 5 to 164, and < 5 to 64 s (three replicates)                                            | N/A                                                                                                                                           | WDPT test**** ranges: 440 to > 3600, 570 to > 3600, and 680 to > 1990 s (three replicates)                                                                                                                                                                                     | WDPT test**** ranges: < 5 to 75, < 5, and < 5 to 20 s (three replicates)                                                  | WDPT tests increased ~2500% for moderate burn and decreased ~75% for severe burns                                                                                                                         | N/A                                                    | Wieting et al., 2017                  |

\*0-1 cm, 1-2 cm, and 2-3 cm depths, respectively

\*\*1 = hydrophilic (< 5 s), 2 = slight (6-10 s), 3-4 = moderate (11-60 s), 5-6 = strong (61-300 s), and 7-8 = severe (> 300 s)

\*\*\*for ash-cap, mixed ash-cap, no ash-cap, and granitic soils, respectively

\*\*\*\*Repellency rating:  $\leq$  5 s = wettable, 5-80 = slight, 80-600 = strong, 600-3600 = severe, > 3600 = extreme

**Table 5** Water quality and soil chemical composition data reported from simulation studies.  $\pm$  indicates the upper and lower bounds of the 95% confidence interval and parentheses indicate standard deviations. An *N/A* entry denotes an unreported study characteristic, *O horizon* is *organic soil horizon*, *Ah horizon* is *soil mineral horizon*, *TOC* is *total organic carbon*, *PyC* is *pyrolyzed carbon*, *DOC* is *dissolved organic carbon*, and *DON* is *dissolved organic nitrogen*.

| Runoff Solutes and Soil Chemical Composition                                                                                                                                                               |                                                                                                                                                                    |                                                                                                                                                                                                                                                                                                                            |                                                                                                                                                                                                                                                                                                     | Summary                                                                                                                                                                                                                                                                                                                                                                          | Error and Variability                                    | Source                        |
|------------------------------------------------------------------------------------------------------------------------------------------------------------------------------------------------------------|--------------------------------------------------------------------------------------------------------------------------------------------------------------------|----------------------------------------------------------------------------------------------------------------------------------------------------------------------------------------------------------------------------------------------------------------------------------------------------------------------------|-----------------------------------------------------------------------------------------------------------------------------------------------------------------------------------------------------------------------------------------------------------------------------------------------------|----------------------------------------------------------------------------------------------------------------------------------------------------------------------------------------------------------------------------------------------------------------------------------------------------------------------------------------------------------------------------------|----------------------------------------------------------|-------------------------------|
| Unburned                                                                                                                                                                                                   | Mild Burn (~100-200 °C)                                                                                                                                            | Moderate Burn (~200-350 °C)                                                                                                                                                                                                                                                                                                | Severe Burn (~>350 °C)                                                                                                                                                                                                                                                                              |                                                                                                                                                                                                                                                                                                                                                                                  |                                                          |                               |
| TOC: O horizon: 20.4 $\pm$ 2.5%; Ah horizon: 16.1 $\pm$ 3.2%, 13.2 $\pm$ 2.1%, and 10.3 $\pm$ 1.6%*<br>PyC: O horizon: 45.3 $\pm$ 6.9%; Ah horizon: 29.8 $\pm$ 6.6%, 28.5 $\pm$ 3.0%, and 26.7 $\pm$ 5.1%* | N/A                                                                                                                                                                | TOC: O horizon: 11.2 $\pm$ 3.7% and 10.4 $\pm$ 0.6% (ashes and O charred, respectively), Ah horizon: 11.4 $\pm$ 1.0%, 12.2 $\pm$ 3.1%, and 11.5 $\pm$ 1.1%*<br>PyC: O horizon: 10.4 $\pm$ 3.4% and 13.6 $\pm$ 1.8% (ashes and O charred, respectively), Ah horizon: 18.5 $\pm$ 1.2%, 23.5 $\pm$ 0.9%, and 27.4 $\pm$ 6.2%* | N/A                                                                                                                                                                                                                                                                                                 | TOC and PyC decreased 47% and 74%, respectively, for the O horizon and decreased 29% and 38%, decreased 8% and 18%, and increased 12% and 3% for 3 depths in the Ah horizon*, respectively, for moderate burns                                                                                                                                                                   | N/A                                                      | Badía-Villas et al., 2014     |
| Total P: 1112 $\pm$ 410, 709 $\pm$ 472, and 1111 $\pm$ 366 mg/kg (three different plots)                                                                                                                   | N/A                                                                                                                                                                | Total P: 1023 $\pm$ 322, 944 $\pm$ 468, and 1488 $\pm$ 411 mg/kg (three replicates)                                                                                                                                                                                                                                        | Total P: 1676 $\pm$ 181, 1243 $\pm$ 462, and 1357 $\pm$ 447 mg/kg (three replicates)                                                                                                                                                                                                                | Total P on average increased 20% for moderate burn and 49% for severe burn areas                                                                                                                                                                                                                                                                                                 | Standard deviations ranged from 11% to 67% of the means  | Blake et al., 2001            |
| Leached cations: 2.2, 1.8, 21.7, and 14.2 kg/ha for Ca, Mg, K, and Na, respectively                                                                                                                        | N/A                                                                                                                                                                | Leached cations: 3.6 and 61.6, 6.7 and 12.1, 27.4 and 18.5, and 14.2 and 26.45 kg/ha for Ca, Mg, K, and Na, respectively (two replicates)                                                                                                                                                                                  | Leached cations: 36.5 and 61.4, 8.3 and 12.7, 28.4 and 39.9, and 13.4 and 25.4 kg/ha for Ca, Mg, K, and Na, respectively (two replicates)                                                                                                                                                           | Leached Ca, Mg, K, and Na on average increased 1382%, 422%, 6%, and 43%, respectively, for moderate burns and 2125%, 483%, 57%, and 37%, respectively, for severe burns                                                                                                                                                                                                          | Standard deviations ranged from 24% to 126% of the means | Cancelo-Gonzalez et al., 2013 |
| Leached metals: 2.52 and 3.84 mg (Al and Fe, respectively)                                                                                                                                                 |                                                                                                                                                                    | Leached metals: 3.01 and 3.55 mg (Al and Fe, respectively)                                                                                                                                                                                                                                                                 | Leached metals: 3.62 and 6.37 mg (Al and Fe, respectively)                                                                                                                                                                                                                                          | Leached Al and Fe increased 19% and decreased 8%, respectively, for moderate burns and increased 44% and 66%, respectively, for severe burns                                                                                                                                                                                                                                     | N/A                                                      | Cancelo-Gonzalez et al., 2015 |
| DOC: 9.35 and 18.4 mg/L<br>Fe: 0.050 and 0.026 ppm (two replicates)                                                                                                                                        | N/A                                                                                                                                                                | DOC: 24.4 and 26.7 (burned at 225 °C), 15.5 and 8.54 mg <sub>c</sub> /L (burned at 350 °C)<br>Fe: 0.058 and 0.100 (burned at 225 °C), 0.034 and 0.009 ppm (burned at 350 °C) (two replicates)                                                                                                                              | DOC: < 0.2 and < 0.2 mg <sub>c</sub> /L<br>Fe: 0.007 and 0.012 ppm (two replicates)                                                                                                                                                                                                                 | DOC and Fe increased 84% and 108%, respectively, for mild-moderate burns, decreased 13% and 43%, respectively, for moderate burns, and decreased 99% and 75%, respectively, for severe burns                                                                                                                                                                                     | N/A                                                      | Cawley et al., 2017           |
| Total C: 410 $\pm$ 18 and 444 $\pm$ 8 g/kg<br>Total P: 165 $\pm$ 10 and 95 $\pm$ 8 mg/kg<br>Total N: 8.1 $\pm$ 2.1 and 5.3 $\pm$ 0.2 g/kg (low nutrient and high nutrient plant biomass, respectively)     | Total C: 595 and 554 g/kg<br>Total P: 88 and 107 mg/kg<br>Total N: ~6 and 11 g/kg (low nutrient and high nutrient plant biomass, respectively) (muffled at 200 °C) | Total N: ~35 and 30 g/kg (muffled at 350 °C) (low nutrient and high nutrient plant biomass, respectively)                                                                                                                                                                                                                  | Total C: 29 and 66 (muffled at 550 °C), 199 and 181 g/kg (10 g lab burn at 460 °C)<br>Total P: 3244 and 4454 (muffled at 550 °C), 1761 and 2090 mg/kg (10 g lab burn at 460 °C)<br>Total N: 5.1 and 4.0 g/kg (10 g lab burn at 460 °C) (low nutrient and high nutrient plant biomass, respectively) | Total C, P, and N on average increased 35%, decreased 25%, and increased 27%, respectively, for mild burns; decreased 89%, increased 2851%, and decreased to no response, respectively, for (muffle furnace) severe burn; and decreased 56%, increased 1381%, and decreased 32%, respectively, for (litter burn) severe burns (total N peaked at moderate burn, increasing 385%) | N/A                                                      | Hogue and Inglett, 2012       |
| DOC: 3.3 (0.7) mg <sub>c</sub> /g; DOC:DON: 32.7 (10.5) mg <sub>c</sub> /mg <sub>N</sub>                                                                                                                   | N/A                                                                                                                                                                | DOC: 1.6 (0.7) mg <sub>c</sub> /g; DOC:DON: 23.9 (7.6) mg <sub>c</sub> /mg <sub>N</sub>                                                                                                                                                                                                                                    | N/A                                                                                                                                                                                                                                                                                                 | DOC and DOC:DON decreased 52% and 27%, respectively, for moderate burn areas                                                                                                                                                                                                                                                                                                     | Standard deviations ranged from 21% to 44% of the means  | Hohner et al., 2019           |
| N/A                                                                                                                                                                                                        | N/A                                                                                                                                                                | N/A                                                                                                                                                                                                                                                                                                                        | PyC median mass loss: 6.6 (0-70.4)% and 15.1 (0-100)% (experimental fire); 15.1 (13.3-16.0)% and 1.0 (0.7-                                                                                                                                                                                          | PyC median mass decreased 6.6% and 15.1% for granular PyC and PyC pieces, respectively, for experimental fire and on average 22.8% and 34%,                                                                                                                                                                                                                                      | Wide range of variability (up to 533% of the             | Santin et al., 2013           |

|                                             |     |                                            |                                                                                                                                                                                                              |                                                                         |          |                      |
|---------------------------------------------|-----|--------------------------------------------|--------------------------------------------------------------------------------------------------------------------------------------------------------------------------------------------------------------|-------------------------------------------------------------------------|----------|----------------------|
|                                             |     |                                            | 25.4)% (lab heating at 370 °C); 27.6 (25.4-34.2)% and 63.3 (20.9-76.7)% (lab heating at 470 °C); 25.7 (21.8-29.0)% and 36.7 (16.7-81.4)% (lab heating at 570 °C) (granular PyC and PyC pieces, respectively) | respectively, for lab muffle burns                                      | medians) |                      |
| TOC: 7.5%, 13%, and 9.6% (three replicates) | N/A | TOC: 17%, 23%, and 7.9% (three replicates) | TOC: 9.7%, 9.2%, and 7.8% (three replicates)                                                                                                                                                                 | TOC increased 60% for moderate burns and decreased 11% for severe burns | N/A      | Wieting et al., 2017 |

\*0-1 cm, 1-2 cm, and 2-3 cm depths, respectively

4  
5  
6

## 7 References

- 8 1 C. Chandler, P. Cheney, P. Thomas, L. Trabaud and D. Williams, *Fire in forestry. Volume 1. Forest fire behavior and effects. Volume 2. Forest fire management and organization.*, John Wiley & Sons, Inc., New  
9 York, 1983.
- 0 2 A. K. Hohner, R. S. Summers and F. L. Rosario-Ortiz, Laboratory simulation of postfire effects on conventional drinking water treatment and disinfection byproduct formation, *AWWA Water Science*, 2019, **1**,  
1 e1155.
- 2 3 M. Jian, M. Berli and T. A. Ghezzehei, Soil Structural Degradation During Low-Severity Burns, *Geophysical Research Letters*, 2018, **45**, 5553–5561.
- 3 4 P. R. Robichaud and R. D. Hungerford, Water repellency by laboratory burning of four northern Rocky Mountain forest soils, *Journal of Hydrology*, 2000, **231–232**, 207–219.
- 4 5 J.-J. Wang, R. A. Dahlgren, M. S. Erşan, T. Karanfil and A. T. Chow, Wildfire Altering Terrestrial Precursors of Disinfection Byproducts in Forest Detritus, *Environ. Sci. Technol.*, 2015, **49**, 5921–5929.
- 5 6 C. Wieting, B. A. Ebel and K. Singha, Quantifying the effects of wildfire on changes in soil properties by surface burning of soils from the Boulder Creek Critical Zone Observatory, *Journal of Hydrology:  
6 Regional Studies*, 2017, **13**, 43–57.  
7
